# Supplementary material for: Highly sensitive, flexible and biocompatible temperature sensor utilizing ultra-long Au@AgNW-based polymeric nanocomposites
Source: Royal Society of Chemistry journal article supplement (doi:10.1039/d1nr05068k), 2021-12-03
Supplement: d1nr05068k1.pdf [file d1nr05068k1.pdf]

## Highly sensitive, flexible and biocompatible temperature sensor utilizing ultra-long Au@AgNW based polymeric nanocomposites

### Supplementary information

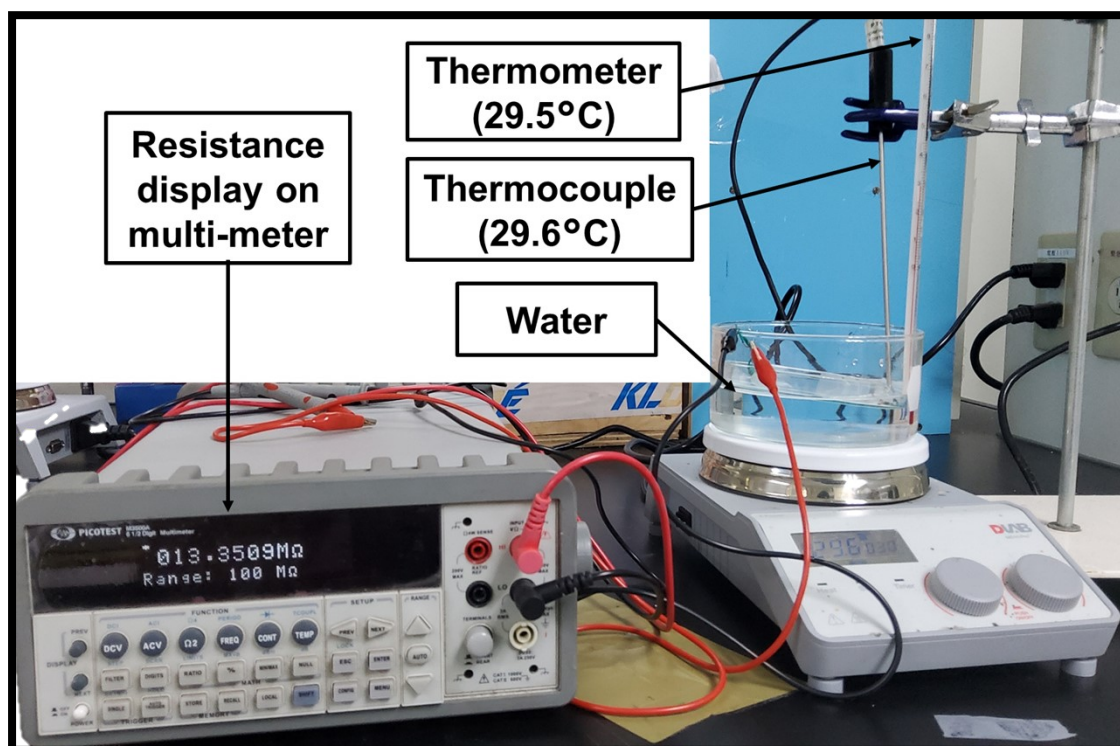

**Figure S1:** Comparison of temperature sensing response of fabricated temperature sensor with a commercial thermometer to measure the temperature of water. The observed resistance of 13.35 M $\Omega$  corresponds to a temperature of  $\sim 29.7^{\circ}\text{C}$  which is similar to that observed by the thermometer ( $29.5^{\circ}\text{C}$ ) and thermocouple ( $29.6^{\circ}\text{C}$ ).

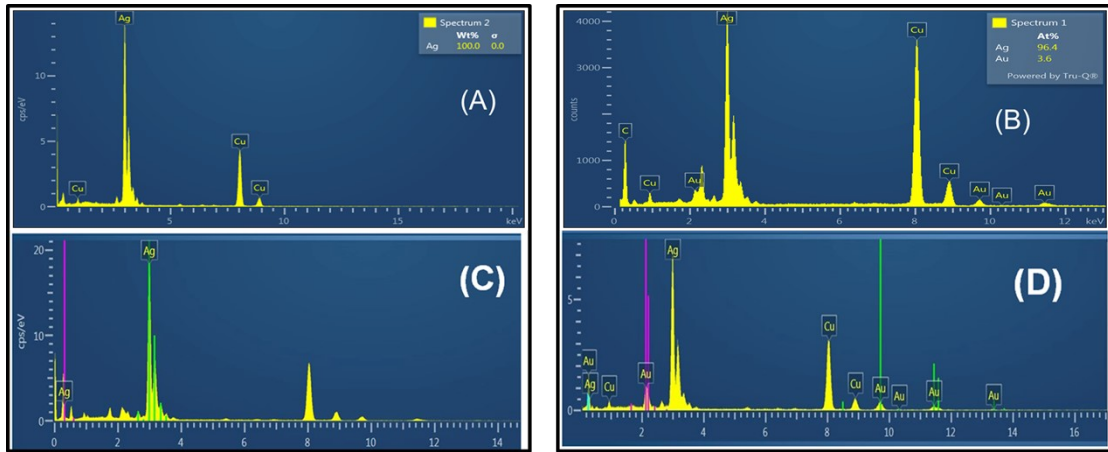

**Figure S2:** EDS spectrum of (a) pristine AgNW and (b) Au@AgNW, illustrating that the new peaks originated after Au coating are only due to Au atoms since all other peaks were already present in the EDS spectrum of pristine AgNW. The green and pink lines in the EDS spectrum represent the peaks corresponding to (c) Ag and (d) Au.
